# Supplementary material for: Printed educational messages aimed at family practitioners fail to increase retinal screening among their patients with diabetes: a pragmatic cluster randomized controlled trial [ISRCTN72772651]
Source: PubMed Central journal article supplement (PMC4261896; doi:10.1186/1748-5908-9-87), 2014-08-06

## Patients

## Physicians

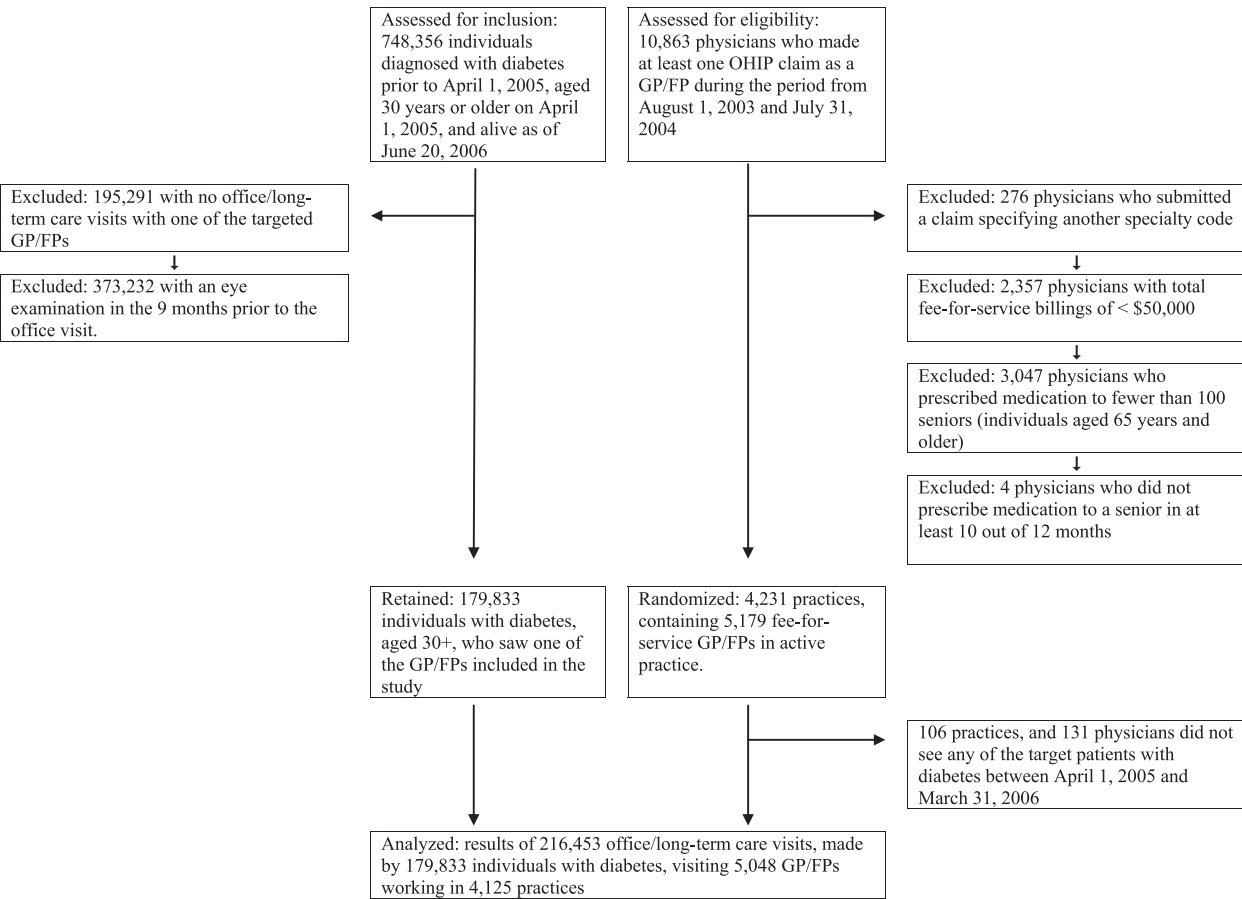

Supplement: 13012_2013_826_MOESM3_ESM.pdf [file 13012_2013_826_MOESM3_ESM.pdf]
